# A proof of concept for neutralizing antibody-guided vaccine design against SARS-CoV-2

**Author:** Li Zhang<sup>1§</sup>, Lei Cao<sup>2§</sup>, Xing-Su Gao<sup>4§</sup>, Bin-Yang Zheng<sup>1§</sup>, Yong-Qiang Deng<sup>3§</sup>, Jing-Xin Li<sup>1,4§</sup>, Rui Feng<sup>2</sup>, Qian Bian<sup>1</sup>, Xi-Ling Guo<sup>1</sup>, Nan Wang<sup>2</sup>, Hong-Ying Qiu<sup>3</sup>, Lei Wang<sup>2</sup>, Zhen Cui<sup>2</sup>, Qing Ye<sup>3</sup>, Geng Chen<sup>1</sup>, Kui-Kui Lu<sup>1</sup>, Yin Chen<sup>1</sup>, Yu-Tao Chen<sup>2</sup>, Hong-Xing Pan<sup>1</sup>, Bao-Li Zhu<sup>1</sup>, Cheng-Feng Qin<sup>3\*</sup>, Xiangxi Wang<sup>2,5\*</sup>, Feng-Cai Zhu<sup>1,4\*</sup>

## Affiliation:

<sup>1</sup> National Health Commission of the People's Republic of China, Key laboratory of Enteric Pathogenic Microbiology (Jiangsu Provincial Center for Disease Control and Prevention), Nanjing 210009, China.

<sup>2</sup> CAS Key Laboratory of Infection and Immunity, National Laboratory of Macromolecules, Institute of Biophysics, Chinese Academy of Sciences, Beijing 100101, China

<sup>3</sup> Beijing Institute of Microbiology and Epidemiology, State Key Laboratory of Pathogen and Biosecurity, No. 20 Dongda Street, Fengtai District, Beijing 100071, People's Republic of China.

<sup>4</sup> Center for Global Health, School of Public Health, Nanjing Medical University, Nanjing 211166, China.

<sup>5</sup> Guangzhou Regenerative Medicine and Health Guangdong Laboratory, Guangzhou 510200, China

\*Correspondence to: X.W. (Email: xiangxi@ibp.ac.cn) or C.F.Q. (Email: qincf@bmi.ac.cn) or F.Z. (Email: jszfc@vip.sina.com)

<sup>§</sup> These authors contributed equally to this work.

---

**Abstract:** Mutations and transient conformational movements of receptor binding domain (RBD) that make neutralizing epitopes momentarily unavailable, present immune escape routes to SARS-CoV-2. To mitigate viral escape, we developed a cocktail of neutralizing antibodies (NAbs) targeting epitopes located on different domains of spike (S) protein. Screening of a library of monoclonal antibodies generated from peripheral blood mononuclear cells of COVID-19 convalescent patients yielded potent NAbs, targeting N-terminal domain (NTD) and RBD domain of S, effective at *nM* concentrations. Remarkably, combination of RBD-targeting NAbs and NTD-binding NAb, FC05, dramatically enhanced the neutralization potency in cell-based assays and animal model. Results of competitive SPR assays and cryo-EM structures of Fabs bound to S unveil determinants of immunogenicity. Combinations of immunogens, identified in NTD and RBD of S, when immunized in rabbits elicited potent protective immune responses against SARS-CoV-2. These results provide a proof-of-concept for neutralization-based immunogen design targeting SARS-CoV-2 NTD and RBD.

**One sentence summary:**

Immunogens identified in the NTD and RBD of the SARS-CoV-2 spike protein using a cocktail of non-competing NAbs when injected in rabbits elicited a potent protective immune response against SARS-CoV-2.

**Main Text:** Coronavirus disease 2019 (COVID-19), caused by the severe acute respiratory syndrome coronavirus 2 (SARS-CoV-2), continues to spread across the world since December 2019 (1, 2). The July 8, 2020 World Health Organization (WHO) Situation Report cited over 11 million COVID-19 cases and 539,000 deaths. These numbers continue to rise daily (3). Concerningly, a variant of the SARS-CoV-2 carrying D614G spike mutation, which seemingly enhances the infectivity has been documented and is fast becoming the dominant strain of SARS-CoV-2 globally (4). Safe and effective preventive as well as therapeutic measures are urgently needed to bring the ongoing pandemic of COVID-19 under control (5). Over the past two months, experimental strategies based on eliciting neutralizing antibodies (NAbs) via immunization of potential vaccine candidates and passive administration of NAbs have shown promise in protecting and curing SARS-CoV-2-challenged nonhuman primates (6-8). The successes of these studies highlight the importance of screening and identification of immunogens

64 capable of eliciting high NAb titers. Furthermore, NAb elicited by immunogens differ  
65 significantly in their abilities to neutralize SARS-CoV-2 and conferring protection. Therefore, a  
66 deep understanding of the nature of NAb capable of potentially neutralizing SARS-CoV-2 and their  
67 epitopes could guide new approaches for the development of vaccines.

68

69 The coronavirus spike (S) protein is a multifunctional molecular machine that facilitates viral  
70 entry into target cells by engaging with cellular receptors and determines to a great extent cell  
71 tropism and host range (9). Coronaviruses S proteins are processed into S1 and S2 subunits by  
72 host proteases, among which S1 is responsible for receptor binding, while the S2 subunit mediates  
73 membrane fusion (10). The S1 subunit typically possesses two types of domains capable of  
74 binding to host cell receptors. For instance, some betacoronaviruses use the N-terminal domain  
75 (NTD) of their S1 subunit to bind sialic acids located on the glycosylated cell-surface receptor (11).  
76 Similarly, the betacoronavirus murine hepatitis virus uses its NTD for binding the protein receptor  
77 CEACAM1 (12). In contrast to this, SARS-CoV and SARS-CoV-2 use the C-terminal domain of  
78 their S1 subunit for binding to their protein receptor hACE2 (13). Although it remains unknown  
79 whether the NTD is involved in the entry of SARS-CoV-2 into host cells, recent studies have  
80 revealed that antibodies targeting the NTD exhibit potent neutralizing activities against  
81 SARS-CoV-2 and MERS-CoV infections (14, 15). Abrogation of the crucial role played by the S  
82 in the establishment of an infection is the main goal of therapies based on neutralizing antibodies  
83 and the focus of antibody-based drug and vaccine design. More recently, a number of  
84 RBD-targeting NAb against SARS-CoV-2, which block the binding of the S trimer to hACE2  
85 have been reported and characterized (16-21). Stochastic conformational movements of the RBD  
86 transiently expose or hide the determinants of receptor binding and some key neutralizing epitopes,  
87 which might open up fortuitous escape routes for the virus. Furthermore, antibody-mediated  
88 selective pressure is known to lead to antigenic drift within the RBD, resulting in the accumulation  
89 of mutations that hamper neutralization by antibodies (22). To address these issues related to  
90 SARS-CoV-2 neutralization, administration of a cocktail of NAb targeting both the RBD and  
91 non-RBD regions, rather than using a single NAb, could potentially increase the potency of  
92 protection *via* binding of NAb to multiple domains of S, thereby preventing escape of the viral  
93 particles from the NAb. In context with this, the immunogenic characteristics of the antigens  
94 targeted by potential NAb cocktails and their structural features can inform strategies for the

development of vaccines and therapeutics against COVID-19.

One of the prospective goals of this study was to generate a large and diverse collection of human NAbs targeting multiple domains of S so as to allow for the formulation of a cocktail of highly potent antibodies that could simultaneously bind to the various regions of S. For this, we first established antigen-binding fragment (Fab) phage display libraries from peripheral blood mononuclear cells (PBMCs) of 5 COVID-19 convalescent patients. After three rounds of panning, ~350 randomly picked colonies were screened by enzyme-linked immunosorbent assay (ELISA) for binding to the SARS-CoV-2 S trimer. A set of 202 positive Fab clones exhibiting tight binding to SARS-CoV-2 were selected for sequencing and further analysis (Fig. 1A). We evaluated the ability of these Fabs to bind to recombinant SARS-CoV-2 NTD, RBD or S2 proteins and observed that 40 (~20%), 117 (58%) and 45 (22%) of these monoclonal antibodies (mAbs) recognized the NTD, RBD and S2, respectively (Fig. 1A and 1B). We then narrowed down our selection of candidates for the development of a cocktail to 10 antibodies picked from each of these three groups based on their binding affinities and genetic diversity assessed from the phylogenetic analysis performed using the amino acid sequences of the VHDJH and VLJL regions (23) (Fig. 1A, fig. S1-S2 and Table S1). Among those selected, 3 (named FC01, FC08 and FC11) target the RBD, 3 (named FC05, FC06 and FC07) recognize the NTD and 4 (named FC118, FC120, FC122 and FC124) are S2-specific mAbs (Fig. 1C and 1D). To find out whether these antibodies cross-react with SARS-CoV and MERS-CoV, we firstly assessed the binding capacity of these mAbs to RBDs, NTDs and S2s from SARS-CoV-2, SARS-CoV and MERS-CoV by ELISA (Fig. 1C). FC11 and FC07 showed cross-binding to SARS-CoV RBD and NTD, respectively. Expectedly, the four S2-directed mAbs interacted with S2s from all the 3 viruses, of which FC122 bound weakly to SARS-CoV and MERS-CoV (Fig. 1C). Surface plasmon resonance (SPR) assays demonstrated that all 10 mAbs exhibit tight bindings to SARS-CoV-2 with affinities in the range of 0.3-62 nM (Fig. 1D). Interestingly, binding affinities of S2-targeting mAbs were relatively weaker than those of RBD- or NTD-targeting antibodies (Fig. 1D and fig. S3).

The effectiveness of the neutralization abilities of the 10 mAbs against SARS-CoV-2 infection when tested using Vero-E6 cells revealed that all 10 showed neutralizing activities with IC50 values ranging from 0.8-520 nM, among which the 3 RBD-targeting and 1 NTD-binding (FC05)

mAbs potently neutralized virus at several nM levels (Fig. 1E). These results, together with the results of the binding site studies, allowed us to rationally evaluate the neutralization potency of the NTD-targeting FC05 in combination with the RBD-targeting NAbs. Not surprisingly, the combination of any one of the RBD-targeting NAbs and FC05 enhanced the neutralization potency dramatically when compared to neutralization performed by using individual NAbs under identical conditions (Fig. 1F). Notably, the cocktail consisting of FC05 (NTD-binding) and FC08 (RBD-binding) yielded the strongest neutralizing activity with an IC<sub>50</sub> value as low as 15 pM, which was better than the cocktail consisting of FC05 and FC01 as well as other combinations of 3 or 4 NAbs (Fig. 1F). Although more recently, synergistic effects between pairs of non-competing RBD-targeting NAbs have been reported for SARS-CoV-2 (19, 22, 24), our cocktail of FC05 and FC08 that bind to different domains of the S trimer provides a proof-of-concept for neutralization-based immunogen design targeting both SARS-CoV-2 NTD and RBD domains.

Next we sought to assess the *in vivo* protection efficacy of these NAbs against a SARS-CoV-2 challenge. A newly established mouse model based on a SARS-CoV-2 mouse adapted strain MASCP6 (25) was used to evaluate potential prophylactic and therapeutic efficacy of these NAbs. BALB/c mice were administered a single dose of 20 mg/kg of FC05 or FC08 or a cocktail of FC05 (NTD-binding) and FC08 (RBD-binding) either 12 h before (day -0.5) or 0.5 day (day 0.5) after viral challenge with  $2 \times 10^4$  PFU of MASCP6 (BetaCoV/Beijing/IMEBJ05-P6/2020) (Fig. 2A). Animals were sacrificed at day 3 for detecting viral loads and examining the pathology of the lungs and tracheas. The number of viral RNA copies estimated in the lungs and tracheas revealed that, in prophylactic settings, a treatment with either individual NAbs or the cocktail led to a 3-4 log reduction of viral loads in both lungs and tracheas at day 3 when compared to the PBS-treated group. Notably, a synergistic protective efficacy was observed for the cocktail (Fig. 2B and 2C). The estimated viral loads from the lungs of groups belonging to therapeutic settings showed similar levels as those observed for the groups of the prophylactic settings, however, the viral loads from the tracheas differed for both the groups. An ~10-fold higher titer was observed for the groups in therapeutic settings (Fig. 2B and 2C). Histopathological examination revealed a typical interstitial pneumonia, including widening of alveolar septum, vasodilation, hyperemia and edema, accompanied by a large number of monocytes and lymphocytes and a small number of lobulated granulocytes and other inflammatory cell infiltration in mice belonging to the PBS control group

(Fig. 2D). In contrast, no obvious lesions of alveolar epithelial cells or focal hemorrhage were observed in the lung sections from either of the antibody-treated groups at day 3 (Fig. 2D).

To gain a better understanding of the synergy observed during the neutralization of SARS-CoV-2 by a cocktail of NAbs, we performed competitive SPR assays. The results of the assays were expected to reveal whether the NAbs recognize the same or different patches of the epitopes. As expected, the binding of the NTD-specific FC05 does not affect the attachment of any of the three RBD-specific NAbs to the SARS-CoV-2 S trimer, explaining the cooperativity in the antibodies of the cocktail as they bind simultaneously to distinct domains (Fig. 3A). Conversely, the 3 RBD-targeting NAbs competed with each other for binding to the SARS-CoV-2 S trimer (Fig. 3B), which may imply that these RBD-targeting antibodies recognize similar epitopes or their epitopes overlap partially. Lastly, none of the 4 S2-specific NAbs were capable of blocking the interactions between soluble hACE2 and the SARS-CoV-2 S trimer (Fig. 3C). To decipher the nature of the epitopes and the mechanism of neutralization at the atomic level, we determined cryo-EM structures of a prefusion stabilized SARS-CoV-2 S ectodomain trimer in complex with the Fab fragments of the NAbs. Surprisingly, the structural studies revealed that all the three RBD-targeting NAbs are capable of destroying the S trimer into monomers or irregular pieces. A similar perturbation of the S trimer was observed previously in the studies conducted on the CR3022 antibody (26). The NTD-binding FC05 however did neither exhibit any such ability of disrupting the S trimer nor did it affect the viral stability (Fig. S4). To gain a deeper understanding of the epitopes targeted by RBD-binding NAbs that disrupt the S trimer, we used a representative antibody, FC08, for performing a competitive SPR-based epitope binding assay. Recently, we mapped the antigenic sites of 3 well characterized RBD-targeting NAbs, H014, HB27 and P17 (16, 20, 21), which bind epitopes located on one side of the RBD, the apical head of the RBD and the receptor binding motif (RBM), respectively. Using these previously characterized antibodies along with FC08 in the assays revealed that only P17 competes with FC08 for binding to the SARS-CoV-2 S trimer. H014 and HB27, as well as the hACE2 can simultaneously bind to SARS-CoV-2 S trimer together with FC08 (Fig. 3D-3F). This observation coupled with an ability of dispersing the S trimer into monomers, suggests that FC08 probably recognizes a cryptic epitope lying towards the interior of the S trimer (Fig. 3D-3F). Cryo-EM characterization of the S-FC05 complex showed full occupancy where one Fab is bound to each NTD of the

homotrimeric S (Fig. 3G). 3D classification revealed that the S trimer adopts a 3-fold symmetrical structure with all three RBDs closed albeit without imposing any symmetry. By applying a C3 symmetry, we reconstructed the cryo-EM structure of the complex at an overall resolution of 3.4 Å. A “block-based” reconstruction approach was used to improve the local resolution (3.9 Å) of the map around the binding interface between NTD and FC05 (Fig. 3G, fig. S5-S7 and table S2). Interestingly, the binding mode of FC05 resembles with that of 4A8, a recently reported SARS-CoV-2 NAb (14) (fig. S8). Similar to 4A8, FC05 recognizes a conformational epitope formed by elements of the N3 and N5 loops located on the NTD with a buried surface area of ~700 Å<sup>2</sup>. The essential epitope contains 12 residues, among which all 12 residues (100 %) are not conserved between SARS-CoV and SARS-CoV-2, explaining FC05’s virus-specific binding and neutralization activities (Fig. 3H-3I and fig. S9). The paratope of FC05 is composed of 4 complementarity-determining regions (CDR) loops: CDRL2 (residues 49-55), CDRH1 (residues 29-33), CDRH2 (residues 50-59) and CDRH3 (residues 99-106) (table S3). Extensive hydrophobic and hydrophilic interactions facilitate the tight binding between FC05 and the NTD. Analysis of the structures also provides structural basis for rationalizing the cooperativity observed when both FC05 and FC08 are used for neutralizing SARS-CoV-2.

Most of the potent neutralizing antibodies reported till date target the RBD of CoV (18-20). Therefore, a number of RBD-subunit based vaccines for protection against SARS, MERS and COVID-19 are under development (27-29). However, RBD-subunit based vaccines could face some critical challenges arising from their relatively low immunogenicity, less diversity within the elicited antibodies and the ensuing potential escape of viral mutants from the antibodies under selective pressure. Our study here, together with other recently published studies, indicates that a subset of NTD-directed antibodies possesses potent neutralizing activities (Fig. 1 and Fig. 2) and that cocktails of antibodies containing NTD-directed as well as RBD-targeting NAbs act in synergy to confer protection against SARS-CoV-2, suggestive of the NTD to be a promising immunogenic partner of the SARS-CoV-2 RBD. To verify this idea, 16 groups of New Zealand rabbits (n=4/group) were injected at day 0, 14 and 28 with various doses of candidate antigen formulations mixed with alum or AS01B adjuvant as follows - 5 µg RBD or 5 µg NTD or 2.5 µg RBD + 2.5 µg NTD; or 20 µg RBD or 20 µg RBD or 10 µg RBD + 10 µg NTD; or 20 µg RBD + 20 µg NTD per dose, 0 µg of antigens in physiological saline as the sham group (Fig. 4). No

inflammation or other adverse effects were observed in the animals. Titers of SARS-CoV-2-specific neutralizing antibodies produced by the animals over a period of time (at week 0, 2, 4 and 6) effective in neutralizing the live virus were monitored using microneutralization assays (MN50). Similar to the immune responses elicited by an inactivated SARS-CoV2 vaccine candidate (PiCoVacc) reported by us previously, the neutralizing antibody titer emerged at week 2, surged at week 4 and continued to increase at week 6 (Fig. 4). Perhaps correlated with the less glycosylation and more neutralizing epitopes present in RBD, the RBD induced much higher NAb titers than the NTD at various doses. However, the combination of RBD and NTD exhibited more robust and stable immunogenicity for neutralization compared with a single immunogen consisting of either RBD or NTD at the same dose tested under identical conditions (Fig. 4). Notably, relatively large differences in the ability of individual animals in eliciting NAb titers were observed within the RBD vaccinated groups. Addition of NTD to RBD not only substantially enhanced the NAb titer, but also remarkably decreased the fluctuation in eliciting NAb titer from immunized animals (Fig. 4). Compared to AS01B, alum based adjuvant facilitates the antigens in boosting immune responses at 5 or 20 µg/dose. Administration of higher doses of antigens during immunization (20 µg RBD + 20 µg NTD) with AS01B led to the highest NAb titer, up to ~1000. In contrast, immunization with higher doses of antigens in conjunction with alum yielded a decreased NAb titer (~200) compared to the median dose (10 µg RBD + 10 µg NTD), indicative of the need for proper collocation of the adjuvant and various doses of antigen during immunization (Fig. 4).

COVID-19 vaccine development is moving at unprecedented speed, with more than 250 candidates under development worldwide. Except for a few inactivated SARS-CoV-2 virus vaccines, most of the candidate vaccines are aimed at the RBD or the spike of SARS-CoV-2 as target immunogen. Selection of the target immunogen is critical for the success of a vaccine, since eliciting a large amount of antibody that binds, but does not neutralize, may lead to low protection or even immunopathology (30). The ideal immunogen should elicit high-quality, functionally neutralizing antibodies while avoiding induction of non-neutralizing antibodies. We are now entering a new era of precision vaccinology in which multi-disciplinary techniques provide avenues to rapidly isolate and characterize human NAb, to define the structural basis of antigenicity, to understand mechanisms of viral neutralization and to guide rational immunogen



design. The immunogenic data derived from immunization with a combination of SARS-CoV-2 RBD and NTD here demonstrates the feasibility of eliciting robust targeted immune profiles by using antibody-guided vaccine design and advance us a step forward towards a future of precision vaccines.

## References and Notes

1. N. Zhu, D. Zhang *et al.*, A Novel Coronavirus from Patients with Pneumonia in China, 2019. *The New England journal of medicine* **382**, 727-733 (2020); published online EpubFeb 20 (10.1056/NEJMoa2001017).
2. N. Chen, M. Zhou *et al.*, Epidemiological and clinical characteristics of 99 cases of 2019 novel coronavirus pneumonia in Wuhan, China: a descriptive study. *Lancet (London, England)* **395**, 507-513 (2020); published online EpubFeb 15 (10.1016/s0140-6736(20)30211-7).
3. W. H. Organization. (July 8, 2020).
4. B. Korber, W. M. Fischer *et al.*, Tracking changes in SARS-CoV-2 Spike: evidence that D614G increases infectivity of the COVID-19 virus. *Cell*, (2020); published online Epub2020/07/03/ (<https://doi.org/10.1016/j.cell.2020.06.043>).
5. K. P. O'Callaghan, A. M. Blatz *et al.*, Developing a SARS-CoV-2 Vaccine at Warp Speed. *Jama*, (2020); published online EpubJul 6 (10.1001/jama.2020.12190).
6. Q. Gao, L. Bao *et al.*, Rapid development of an inactivated vaccine candidate for SARS-CoV-2. *Science*, (2020); published online EpubMay 6 (10.1126/science.abc1932).
7. J. Yu, L. H. Tostanoski *et al.*, DNA vaccine protection against SARS-CoV-2 in rhesus macaques. *Science*, (2020); published online EpubMay 20 (10.1126/science.abc6284).
8. R. Shi, C. Shan *et al.*, A human neutralizing antibody targets the receptor-binding site of SARS-CoV-2. *Nature*, (2020); published online EpubMay 26 (10.1038/s41586-020-2381-y).
9. F. Li, Structure, Function, and Evolution of Coronavirus Spike Proteins. *Annual review of virology* **3**, 237-261 (2016); published online EpubSep 29 (10.1146/annurev-virology-110615-042301).
10. M. Hoffmann, H. Kleine-Weber *et al.*, SARS-CoV-2 Cell Entry Depends on ACE2 and TMPRSS2 and Is Blocked by a Clinically Proven Protease Inhibitor. *Cell* **181**, 271-280 e278 (2020); published online EpubApr 16 (10.1016/j.cell.2020.02.052).
11. X. Huang, W. Dong *et al.*, Human Coronavirus HKU1 Spike Protein Uses O-Acetylated Sialic Acid as an Attachment Receptor Determinant and Employs Hemagglutinin-Esterase Protein as a Receptor-Destroying Enzyme. *Journal of virology* **89**, 7202-7213 (2015); published online EpubJul (10.1128/JVI.00854-15).
12. J. Shang, Y. Wan *et al.*, Structure of mouse coronavirus spike protein complexed with receptor reveals mechanism for viral entry. *PLoS pathogens* **16**, e1008392 (2020); published online EpubMar (10.1371/journal.ppat.1008392).
13. J. Shang, Y. Wan *et al.*, Cell entry mechanisms of SARS-CoV-2. *Proceedings of the National Academy of Sciences of the United States of America* **117**, 11727-11734 (2020); published online EpubMay 26 (10.1073/pnas.2003138117).

- 291 14. X. Chi, R. Yan *et al.*, A neutralizing human antibody binds to the N-terminal domain of the  
292 Spike protein of SARS-CoV-2. *Science*, (2020); published online EpubJun 22  
293 (10.1126/science.abc6952).
- 294 15. H. Zhou, Y. Chen *et al.*, Structural definition of a neutralization epitope on the N-terminal  
295 domain of MERS-CoV spike glycoprotein. *Nature communications* **10**, 3068 (2019); published  
296 online EpubJul 11 (10.1038/s41467-019-10897-4).
- 297 16. Y.-Q. D. Zhe Lv, Qing Ye, Lei Cao, Chun-Yun Sun, Changfa Fan, Weijin Huang, Shihui Sun, Yao  
298 Sun, Ling Zhu, Qi Chen, Nan Wang, Jianhui Nie, Zhen Cui, Dandan Zhu, Neil Shaw, Xiao-Feng Li,  
299 Qianqian Li, Liangzhi Xie, Youchun Wang, Zihao Rao, Cheng-Feng Qin, Xiangxi Wang, Structural  
300 basis for neutralization of SARS-CoV-2 and SARS-CoV by a potent therapeutic antibody.  
301 *bioRxiv : the preprint server for biology*, (2020).
- 302 17. D. Pinto, Y. J. Park *et al.*, Cross-neutralization of SARS-CoV-2 by a human monoclonal  
303 SARS-CoV antibody. *Nature* **583**, 290-295 (2020); published online EpubJul  
304 (10.1038/s41586-020-2349-y).
- 305 18. A. Z. Wec, D. Wrapp *et al.*, Broad neutralization of SARS-related viruses by human monoclonal  
306 antibodies. *Science*, (2020); published online EpubJun 15 (10.1126/science.abc7424).
- 307 19. P. J. M. Brouwer, T. G. Caniels *et al.*, Potent neutralizing antibodies from COVID-19 patients  
308 define multiple targets of vulnerability. *Science*, (2020); published online EpubJun 15  
309 (10.1126/science.abc5902).
- 310 20. Y.-Q. D. Ling Zhu, Rong-Rong Zhang, Zhen Cui, Chun-Yun Sun, Chang-Fa Fan, Liangzhi Xie,  
311 Youchun Wang, Xiangxi Wang, Cheng-Feng Qin, Double Lock of a Potent Human Therapeutic  
312 Monoclonal Antibody against SARS-CoV-2. *bioRxiv : the preprint server for biology*, (2020).
- 313 21. Y. S. Hangping Yao, Yong-Qiang Deng, Nan Wang, Xiao-Feng Li, Yongcong Tan, Na-na Zhang,  
314 Luanjuan Li, Cheng-Feng Qin, Xiangxi Wang, Rational Development of a Human Antibody  
315 Cocktail that Deploys Multiple Functions to Confer Pan-SARS-CoVs Protection. *bioRxiv : the*  
316 *preprint server for biology*, (2020).
- 317 22. A. Baum, B. O. Fulton *et al.*, Antibody cocktail to SARS-CoV-2 spike protein prevents rapid  
318 mutational escape seen with individual antibodies. *Science*, (2020); published online  
319 EpubJun 15 (10.1126/science.abd0831).
- 320 23. S. Kumar, G. Stecher *et al.*, MEGA7: Molecular Evolutionary Genetics Analysis Version 7.0 for  
321 Bigger Datasets. *Molecular biology and evolution* **33**, 1870-1874 (2016); published online  
322 EpubJul (10.1093/molbev/msw054).
- 323 24. Y. Wu, F. Wang *et al.*, A noncompeting pair of human neutralizing antibodies block COVID-19  
324 virus binding to its receptor ACE2. *Science* **368**, 1274-1278 (2020); published online EpubJun  
325 12 (10.1126/science.abc2241).
- 326 25. H. Gu, Q. Chen *et al.*, Rapid adaptation of SARS-CoV-2 in BALB/c mice: Novel mouse model for  
327 vaccine efficacy. *bioRxiv*, 2020.2005.2002.073411 (2020)10.1101/2020.05.02.073411).
- 328 26. J. Huo, Y. Zhao *et al.*, Neutralization of SARS-CoV-2 by Destruction of the Prefusion Spike. *Cell*  
329 *host & microbe*, (2020); published online EpubJun 19 (10.1016/j.chom.2020.06.010).
- 330 27. L. Dai, T. Zheng *et al.*, A Universal Design of Betacoronavirus Vaccines against COVID-19,  
331 MERS, and SARS. *Cell*, (2020); published online EpubJun 28 (10.1016/j.cell.2020.06.035).
- 332 28. N. Wang, J. Shang *et al.*, Subunit Vaccines Against Emerging Pathogenic Human Coronaviruses.  
333 *Frontiers in microbiology* **11**, 298 (2020)10.3389/fmicb.2020.00298).
- 334 29. J. Yang, W. Wang *et al.*, A vaccine targeting the RBD of the S protein of SARS-CoV-2 induces

- 335 protective immunity. *Nature*, (2020); published online EpubJul 29
- 336 (10.1038/s41586-020-2599-8).
- 337 30. B. S. Graham, Rapid COVID-19 vaccine development. *Science (New York, N.Y.)* **368**, 945-946
- 338 (2020); published online EpubMay 29 (10.1126/science.abb8923).
- 339 31. C. F. Barbas, 3rd, A. S. Kang *et al.*, Assembly of combinatorial antibody libraries on phage
- 340 surfaces: the gene III site. *Proceedings of the National Academy of Sciences of the United*
- 341 *States of America* **88**, 7978-7982 (1991); published online EpubSep 15
- 342 (10.1073/pnas.88.18.7978).
- 343 32. Z. Chen, X. Ren *et al.*, An elaborate landscape of the human antibody repertoire against
- 344 enterovirus 71 infection is revealed by phage display screening and deep sequencing. *mAbs* **9**,
- 345 342-349 (2017); published online EpubFeb/Mar (10.1080/19420862.2016.1267086).
- 346 33. D. N. Mastronarde, Automated electron microscope tomography using robust prediction of
- 347 specimen movements. *Journal of structural biology* **152**, 36-51 (2005); published online
- 348 EpubOct (10.1016/j.jsb.2005.07.007).
- 349 34. K. Zhang, Gctf: Real-time CTF determination and correction. *Journal of structural biology* **193**,
- 350 1-12 (2016); published online EpubJan (10.1016/j.jsb.2015.11.003).
- 351 35. S. H. Scheres, Processing of Structurally Heterogeneous Cryo-EM Data in RELION. *Methods in*
- 352 *enzymology* **579**, 125-157 (2016)10.1016/bs.mie.2016.04.012).
- 353 36. S. H. Scheres, S. Chen, Prevention of overfitting in cryo-EM structure determination. *Nature*
- 354 *methods* **9**, 853-854 (2012).
- 355 37. Y. Yang, P. Yang *et al.*, Architecture of the herpesvirus genome-packaging complex and
- 356 implications for DNA translocation. *Protein & cell* **11**, 339-351 (2020); published online
- 357 EpubMay (10.1007/s13238-020-00710-0).
- 358 38. N. Wang, D. Zhao *et al.*, Architecture of African swine fever virus and implications for viral
- 359 assembly. *Science* **366**, 640-644 (2019); published online EpubNov 1
- 360 (10.1126/science.aaz1439).
- 361 39. N. Wang, W. Chen *et al.*, Structures of the portal vertex reveal essential protein-protein
- 362 interactions for Herpesvirus assembly and maturation. *Protein & cell* **11**, 366-373 (2020);
- 363 published online EpubMay (10.1007/s13238-020-00711-z).
- 364 40. A. Kucukelbir, F. J. Sigworth *et al.*, Quantifying the local resolution of cryo-EM density maps.
- 365 *Nature methods* **11**, 63-65 (2014).
- 366 41. L. A. Kelley, S. Mezulis *et al.*, The Phyre2 web portal for protein modeling, prediction and
- 367 analysis. *Nature Protocols* **10**, 845-858 (2015); published online EpubJun
- 368 (10.1038/nprot.2015.053).
- 369 42. E. F. Pettersen, T. D. Goddard *et al.*, UCSF Chimera—a visualization system for exploratory
- 370 research and analysis. *Journal of computational chemistry* **25**, 1605-1612 (2004).
- 371 43. A. Brown, F. Long *et al.*, Tools for macromolecular model building and refinement into
- 372 electron cryo-microscopy reconstructions. *Acta Crystallographica Section D-Structural Biology*
- 373 **71**, 136-153 (2015); published online EpubJan (10.1107/S1399004714021683).
- 374 44. P. V. Afonine, R. W. Grosse-Kunstleve *et al.*, Towards automated crystallographic structure
- 375 refinement with phenix. refine. *Acta Crystallographica Section D: Biological Crystallography*
- 376 **68**, 352-367 (2012).
- 377 45. V. B. Chen, W. B. Arendall *et al.*, MolProbity: all-atom structure validation for macromolecular
- 378 crystallography. *Acta Crystallographica Section D: Biological Crystallography* **66**, 12-21 (2010).

379 46. P. Gouet, E. Courcelle *et al.*, ESPript: analysis of multiple sequence alignments in PostScript.  
380 *Bioinformatics* **15**, 305-308 (1999).  
381

382 **Acknowledgments:** We thank Prof. Zihe Rao for valuable discussion on this project and thank  
383 Drs. Chunyun Sun, and Changfa Fan for providing critical reagents and thank Drs. Xiaojun Huang,  
384 Boling Zhu and Gang Ji for cryo-EM data collection, the Center for Biological imaging (CBI) in  
385 Institute of Biophysics for EM work. This work was supported by the National Key Research and  
386 Development Program (2020YFA0707500, 2018YFA0900801), the Strategic Priority Research  
387 Program (XDB29010000), National Natural Science Foundation of China (NSFC) (grants  
388 82041005, 31900873). Feng-Cai Zhu and Li Zhang were supported by the Research and  
389 development project of Jiangsu Province (BE20200601) and The Social Development Project of  
390 Jiangsu Province (BE2020720). Xiangxi Wang was supported by Ten Thousand Talent Program  
391 and the NSFS Innovative Research Group (No. 81921005). Cheng-Feng Qin was supported by the  
392 National Science Fund for Distinguished Young Scholar (No. 81925025) and the Innovative  
393 Research Group (No. 81621005) from the NSFC, and the Innovation Fund for Medical Sciences  
394 (No.2019-I2M-5-049) from the Chinese Academy of Medical Sciences.

395 **Author contribution:** F-C.Z., X.W. and C-F.Q conceived, designed and supervised the study and  
396 wrote the paper. L.Z., X-S.G., B-Y.Z., contributed in construction of the antibody libraries,  
397 panning and sequencing of mAbs, generation of mAbs, and the cross-reaction of mAbs. J-X.L.  
398 contributed in the paper drafting, plotting histogram, and data interpretation. H-X.P., B-L.Z.  
399 collected data. X-L.G., Y.C., performed neutralizing activities assay (CPE) in Vero-E6 cells. Q.B.,  
400 G.C., K-K. L., evaluated safety and immunogenicity of a recombinant two components candidate  
401 COVID-19 vaccine in New Zealand rabbits. C.L. purified proteins, prepared cryo-EM grids and  
402 collected cryo-EM data. Y-Q.D. and Q.Y. performed live virus and animal assays; N.W., L.W., L.C.  
403 and X.W. processed data. L.C. built and refined the structure model. N.W., L.C. and X.W.  
404 analyzed the structures. R.F. performed SPR assay. All authors read and approved the contents of  
405 the manuscript.

406 **Data and materials availability:** Cryo-EM density maps have been deposited at the Electron  
407 Microscopy Data Bank with accession codes EMD-XXXX (SARS-CoV-2 S-FC05) and  
408 EMD-YYYY (SARS-CoV-2 S in complex with FC05 and H014) and related atomic models have  
409 been deposited in the protein data bank under accession code 6XXX and 6YYY, respectively.  
410

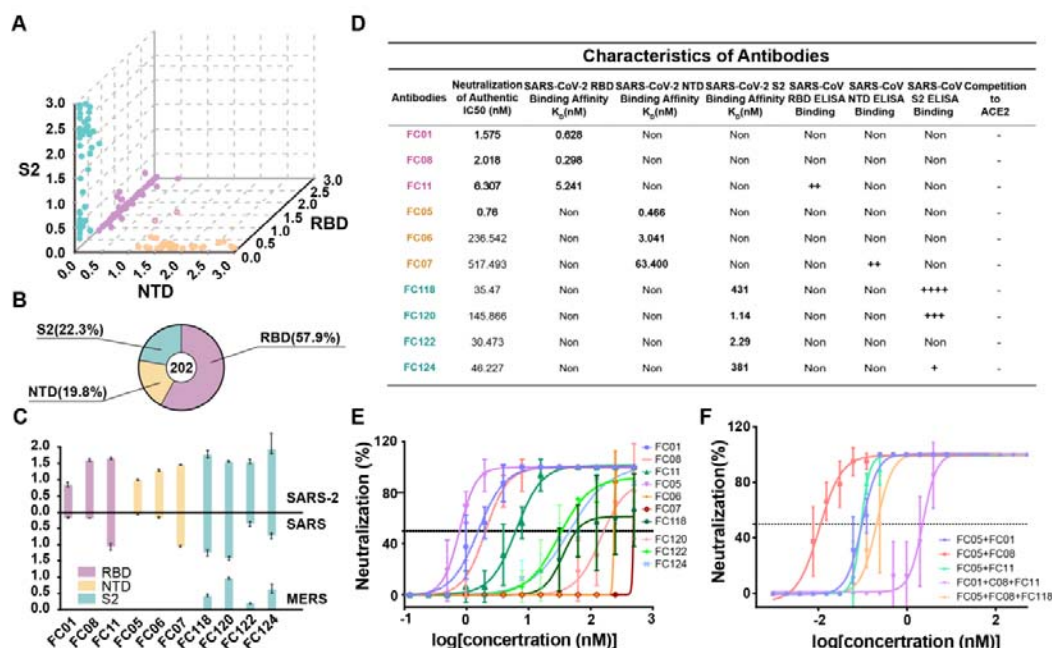

**Figure 1. Identification and characterization of SARS-CoV-2 S-targeting neutralizing antibodies.** (A) Characteristics of antibodies binding to SARS-CoV-2 RBD, NTD or S2 by ELISA. SARS-CoV-2 RBD-, NTD- and S2-specific mAbs are colored in pink, wheat and pale cyan dots, respectively. A number of mAbs that exhibit non-specific bindings to both SARS-CoV-2 RBD and NTD are presented in wheat dots with pink outlines. (B) Proportion of SARS-CoV-2 S-specific antibodies targeting each of the indicated domains. (C) Bar graph depicting the binding of 10 representative mAbs (FC01, FC05, FC06, FC07, FC08, FC11, FC118, FC120, FC122 and FC124) to S proteins of SARS-CoV-2, SARS-CoV and MERS-CoV using ELISA assays (shown as mean  $\pm$  S.D. of values derived from experiments conducted in triplicate). (D) Summary of the performance of the representative 10 mAbs in the indicated assays. *In vitro* neutralization activities of 10 individual mAbs (E) or the cocktail of antibodies (F) against SARS-CoV-2 in Vero-E6 cells. Neutralizing activities are represented as mean  $\pm$  SD. Experiments were performed in triplicates

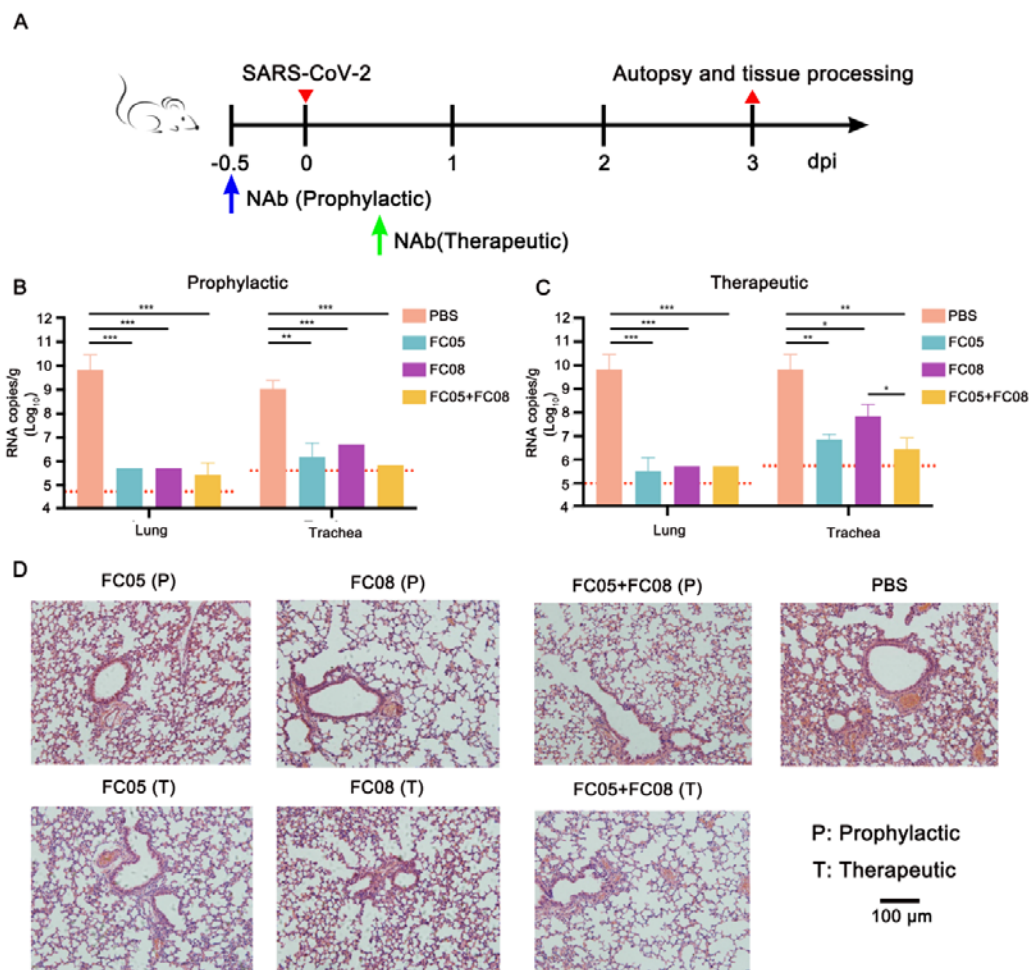

**Figure 2 Prophylactic and therapeutic efficacy of FC05 or FC08 or the cocktail of antibodies of FC05 and FC08 in SARS-CoV-2 susceptible mice model.** (A) Experimental design for therapeutic and prophylactic evaluations of FC05 or FC08 or the cocktail of antibodies consisting of FC05 and FC08 by using a mouse adapted SARS-CoV-2 virus (MASCp6) in mice model. Group of BALB/c mice were infected intranasally with  $2 \times 10^4$  PFU of MASCp6. A dose of 20 mg/kg of antibody was administrated intraperitoneally at 12 hours before infection (the prophylactic group, P) or at 2 hours after infection (the therapeutic group, T). PBS injection was used as a negative control group. Then, the lung and the trachea tissues of mice were collected at 3 and 5 dpi for virus load measurement and histopathological analysis. (B) and (C) Virus loads of lung and trachea tissues at 3 dpi in mouse model. The viral loads of the tissues were determined by qRT-PCR (\* $P < 0.05$ ; \*\* $P < 0.01$ ; \*\*\* $P < 0.001$ ). Data are represented as mean  $\pm$  SD. Dashed lines

---

441 represent the limit of detection. (D) Histopathological analysis of lung and trachea samples at 3  
442 dpi. Scale bar: 100  $\mu$ m.

443

444

445

446

447

448

449

450

451

452

453

454

455



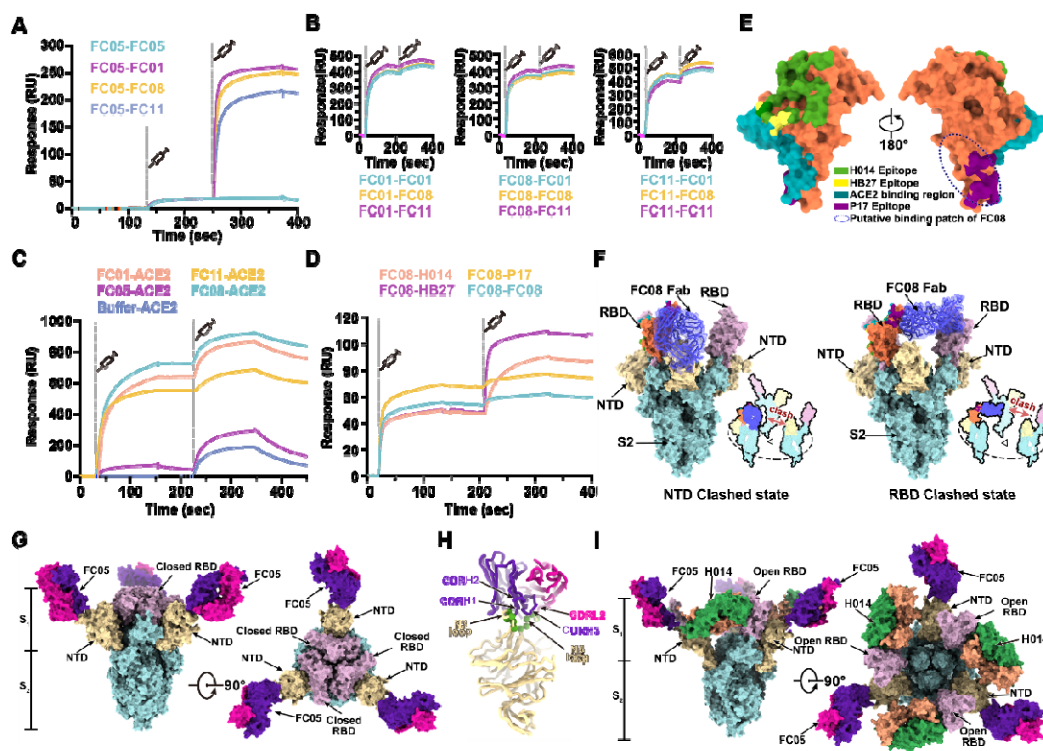

456

457 **Figure 3. Epitope mapping of SARS-CoV-2 NAbs.** (A) SPR kinetics of simultaneous binding of  
458 FC05 and 3 RBD-directed NAbs to SARS-CoV-2 S trimer. (B) SPR-based competitive binding of  
459 3 RBD-directed NAbs to SARS-CoV-2 S trimer. SARS-CoV-2 S trimer was initially immobilized  
460 onto the sensor. 1 NAb was first injected, followed by the other 2, which indicated these 3  
461 RBD-directed NAbs competed with each other for binding to the SARS-CoV-2 S trimer. (C)  
462 Binding of any one RBD-directed NAb blocks the interactions between ACE2 and SARS-CoV-2  
463 S trimer assessed by competitive SPR. (D) Competitive SPR-based epitope mapping of FC08  
464 through 3 recently well characterized RBD-targeting SARS-CoV-2 NAbs, H014, HB27 and P17.  
465 The results indicate P17 competes with FC08 for binding to the SARS-CoV-2 S trimer, while  
466 H014 and HB27 are capable of simultaneously binding to SARS-CoV-2 S trimer together with  
467 FC08. (E) FC08 epitope analysis on the RBD surface. The epitope clusters of H014, P17 and  
468 HB27, and the binding region for ACE2 are shown in indicated colors. Putative epitopes are  
469 indicated by dashed lines. (F) Two putative models for FC08 binding to SARS-CoV-2 S trimer.  
470 Domains of S2 and NTD are colored in cyan and yellow, respectively. The color scheme for the  
471 RBD bound FC08 is same as Fig. 3E and the other 2 RBDs are colored in violet. FC08 Fab is  
472 presented as blue cartoon with 50% transparent surface. (G) Cryo-EM structure of SARS-CoV-2 S  
473 trimer-FC05 complex. Each S monomer is depicted by various colors and the FC05 Fabs are



---

474 shown in hotpink (light chains) and purpleblue (heavy chains). (H) Interactions between the NTD  
475 and FC05. The loops involved in interactions with FC05 are highlighted in green and key CDRs  
476 are labeled. (I) Surface representation of the RBD of SARS-CoV-2 S. The areas buried  
477 by FC05 is marked by sky blue lines. Sequence identities and differences between the  
478 S of SARS-CoV and SARS-CoV-2 are shown in pink and green, respectively,  
479 mapped on the surface of SARS-CoV-2 S/RBD.

480

481

482

483

484

485

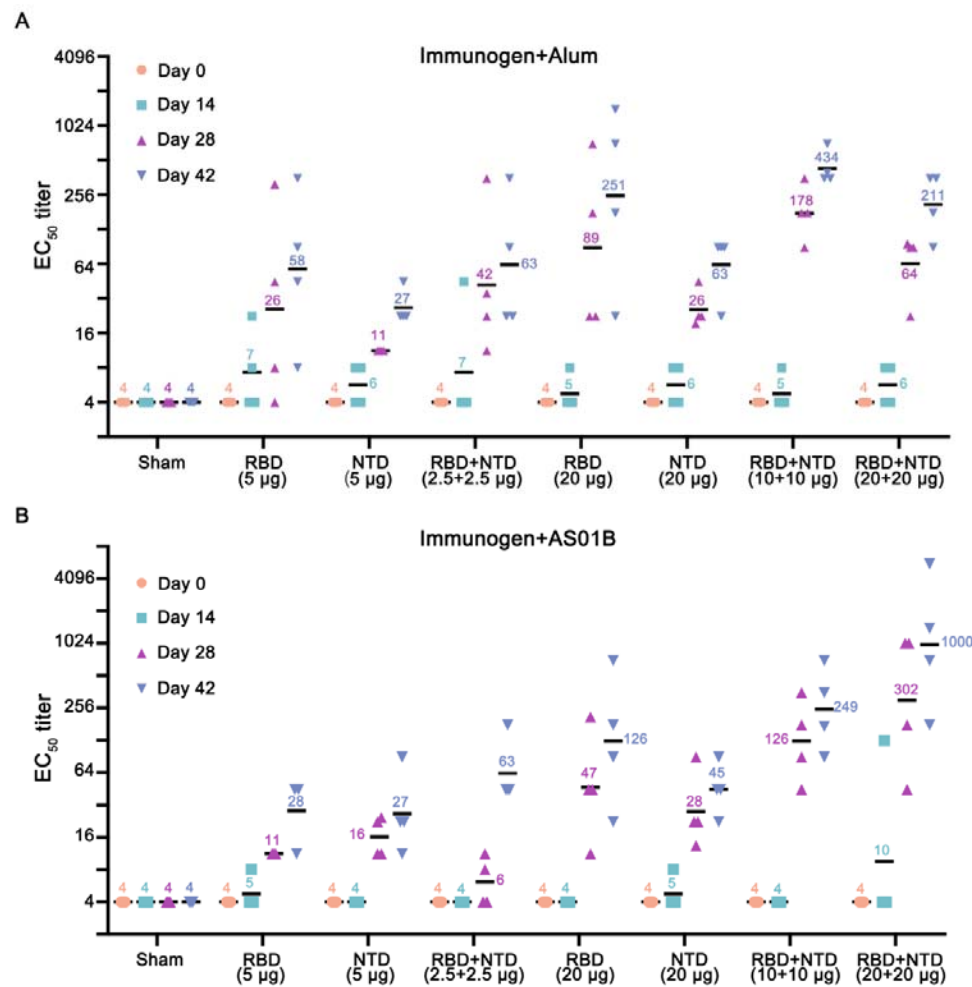

**Figure 4. Immunogenic evaluation of candidate antigen formulations mixed with alum or AS01B adjuvant in rabbits.** (A-B) Rabbits were immunized intramuscularly with various doses of individual (RBD or NTD) or combined (RBD+NTD) immunogens mixed with alum or AS01B adjuvant or adjuvant only (sham) (n=4). Neutralizing antibody titer against live SARS-CoV-2 was measured. Data points represent mean +/- SEM of individual rabbits from four independent experiments; error bars reflect SEM; horizontal lines indicate the geometric mean titer (GMT) of EC<sub>50</sub> for each group.
